# Supplementary material for: Screening of Tumor Antigens and Construction of Immune Subtypes for mRNA Vaccine Development in Head and Neck Squamous Cell Carcinoma
Source: MDPI journal article supplement (doi:10.3390/biom13010090), 2022-12-31
Supplement: s1 [file s1]

# **Screening of tumor antigens and construction of immune subtypes for mRNA vaccine development in head and neck squamous cell carcinoma**

Hong-Xia Li<sup>1</sup>, Tian-Run Liu<sup>1</sup>, Zhao-Xu Tu<sup>2</sup>, Chu-Bo Xie<sup>1</sup>, Wei-Ping Wen<sup>3,4,1\*</sup>, Wei Sun<sup>3,4\*</sup>

<sup>1</sup> Department of Otorhinolaryngology Head and Neck Surgery, The Sixth Affiliated Hospital, Sun Yat-sen University, Guangzhou, Guangdong 510655, China.

<sup>2</sup> Guangdong Institute of Gastroenterology, The Sixth Affiliated Hospital, Sun Yat-sen University, Guangzhou, Guangdong 510655, China

<sup>3</sup> Department of Otolaryngology, The First Affiliated Hospital, Sun Yat-sen University, Guangzhou, Guangdong, China

<sup>4</sup> Otorhinolaryngology Institute, Sun Yat-sen University, Guangzhou, Guangdong, China

\* Correspondence: Wei Sun, *E-mail*: [sunwei26@mail.sysu.edu.cn](mailto:sunwei26@mail.sysu.edu.cn), And Wei-Ping Wen, *E-mail*: [wenwp@mail.sysu.edu.cn](mailto:wenwp@mail.sysu.edu.cn)

Supplementary Figures and Figure Legends

Figure S1

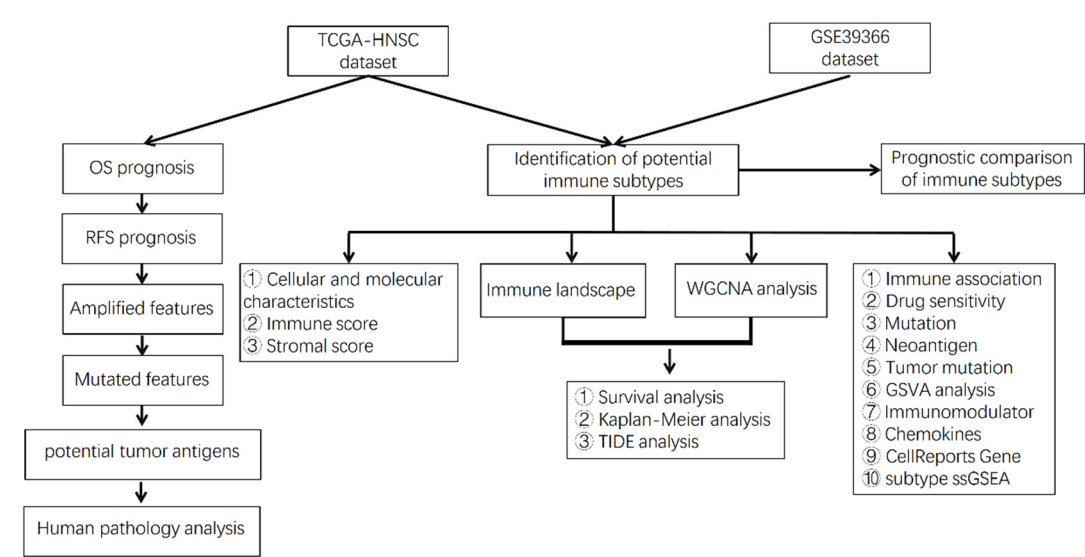

Figure S1. Flowchart diagram of the analysis process of this study.

Figure S2

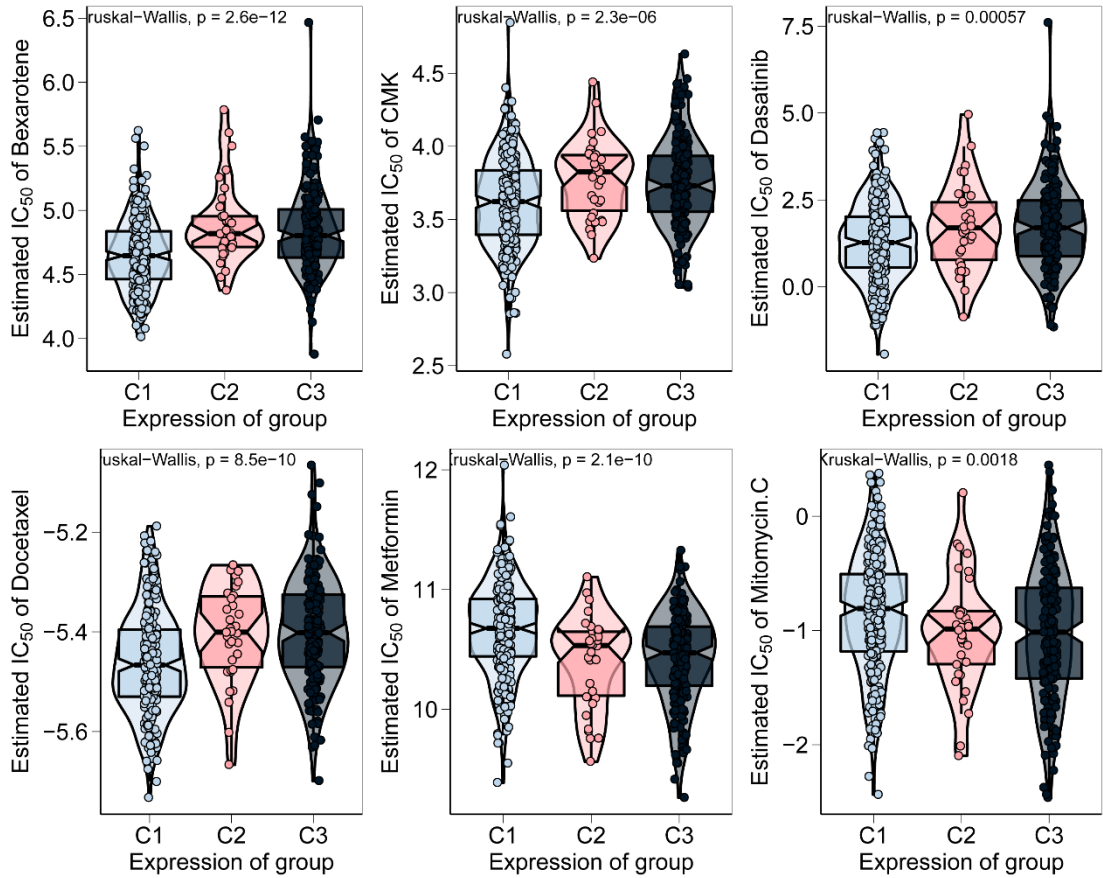

**Figure S2.** Drug sensitivity analysis among immune subtypes.

**Figure S3**

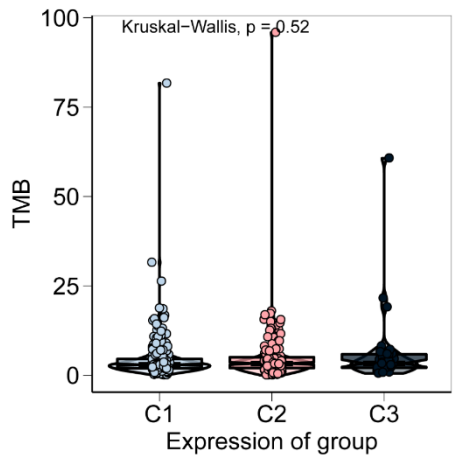

**Figure S3.** The TMB between expression groups of subtypes

**Figure S4**

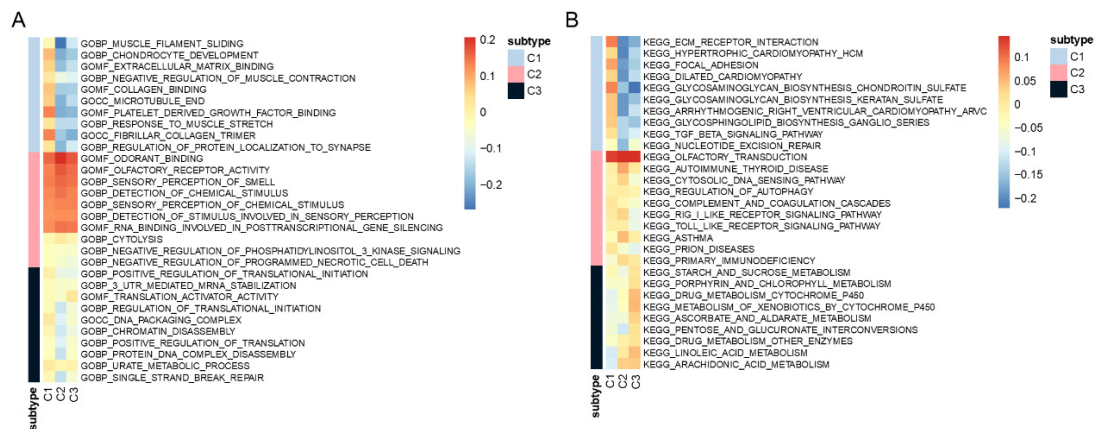

**Figure S4.** Enrichment analysis of immune subtype related pathways. GO analysis (A) and KEGG analysis (B) of subtype-related ssGSEA.

**Figure S5**

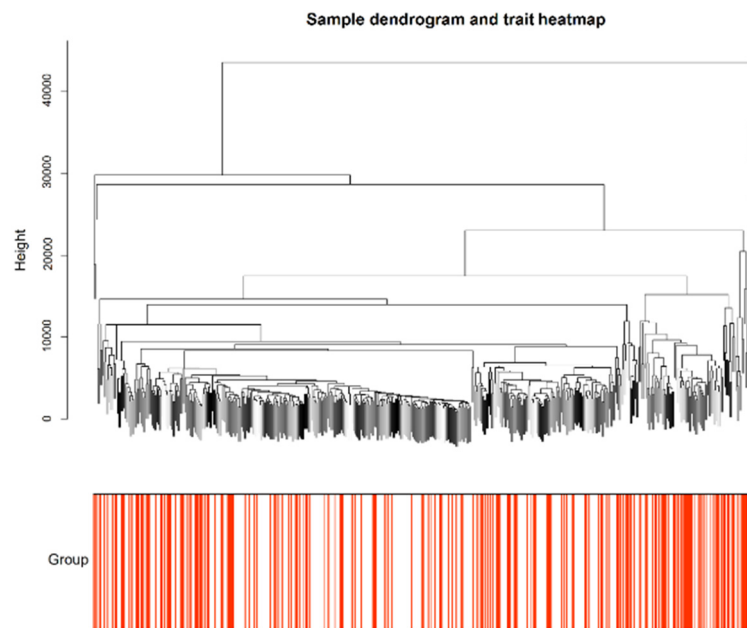

**Figure S5.** The clustering diagram of HNSCC sample.
